# Supplementary material
Source: PubMed Central journal article supplement (PMC3061338)
Supplement: NIHMS278453-supplement-supplement_1.pdf [file NIHMS278453-supplement-supplement_1.pdf]

## SUPPORTING INFORMATION

Additional Supporting Information may be found in the online version of this article:

**Figure S1.** The *sos6-1* mutation does not affect *RD29A::LUC* expression and responses to ABA inhibition.

**Figure S2.** Comparison of SOS6 and other cellulose synthase-like (CSLD) proteins in the CSLD subfamily with cellulose synthase 1 (CESA1).

**Figure S3.** mRNA levels of *CSLD* genes determined by real-time PCR analysis without or after NaCl treatment in *sos6-1* plants.

**Figure S4.** The *csld1* mutation does not affect plant responses to NaCl or mannitol.

**Figure S5.** The *csld2* mutation does not affect plant responses to NaCl or mannitol.

**Figure S6.** The *csld3* mutation does not affect plant responses to NaCl or mannitol.

**Figure S7.** The *csld4* mutation does not affect plant responses to NaCl or mannitol.

**Figure S8.** The *csld6* mutation does not affect plant responses to NaCl or mannitol.

**Figure S9.** Validation of microarray results by real-time PCR analysis.

**Table S1.** Genes with reduced expression in root of *sos6-1* by at least two-fold compared with wild type.

**Table S2.** Genes with increased expression in root of *sos6-1* by at least two-fold compared with wild type.

**Table S3.** Genes with increased expression in shoot of *sos6-1* by at least two-fold compared with wild type.

**Table S4.** List of primers.

**Data S1.** References.

Please note: As a service to our authors and readers, this journal provides supporting information supplied by the authors. Such materials are peer-reviewed and may be re-organized for online delivery, but are not copy-edited or typeset. Technical support issues arising from supporting information (other than missing files) should be addressed to the authors.
